# Supplementary material
Source: PubMed Central journal article supplement (PMC4484741)
Supplement: NIHMS318405-supplement-01.pdf [file NIHMS318405-supplement-01.pdf]

Data File: c:\hplc\system1\051209a.001\051209a.gdt  
Date acquired: Tue May 12 2009 15:40:10  
c:\hplc\system1\051209a.001\051209a.gdt

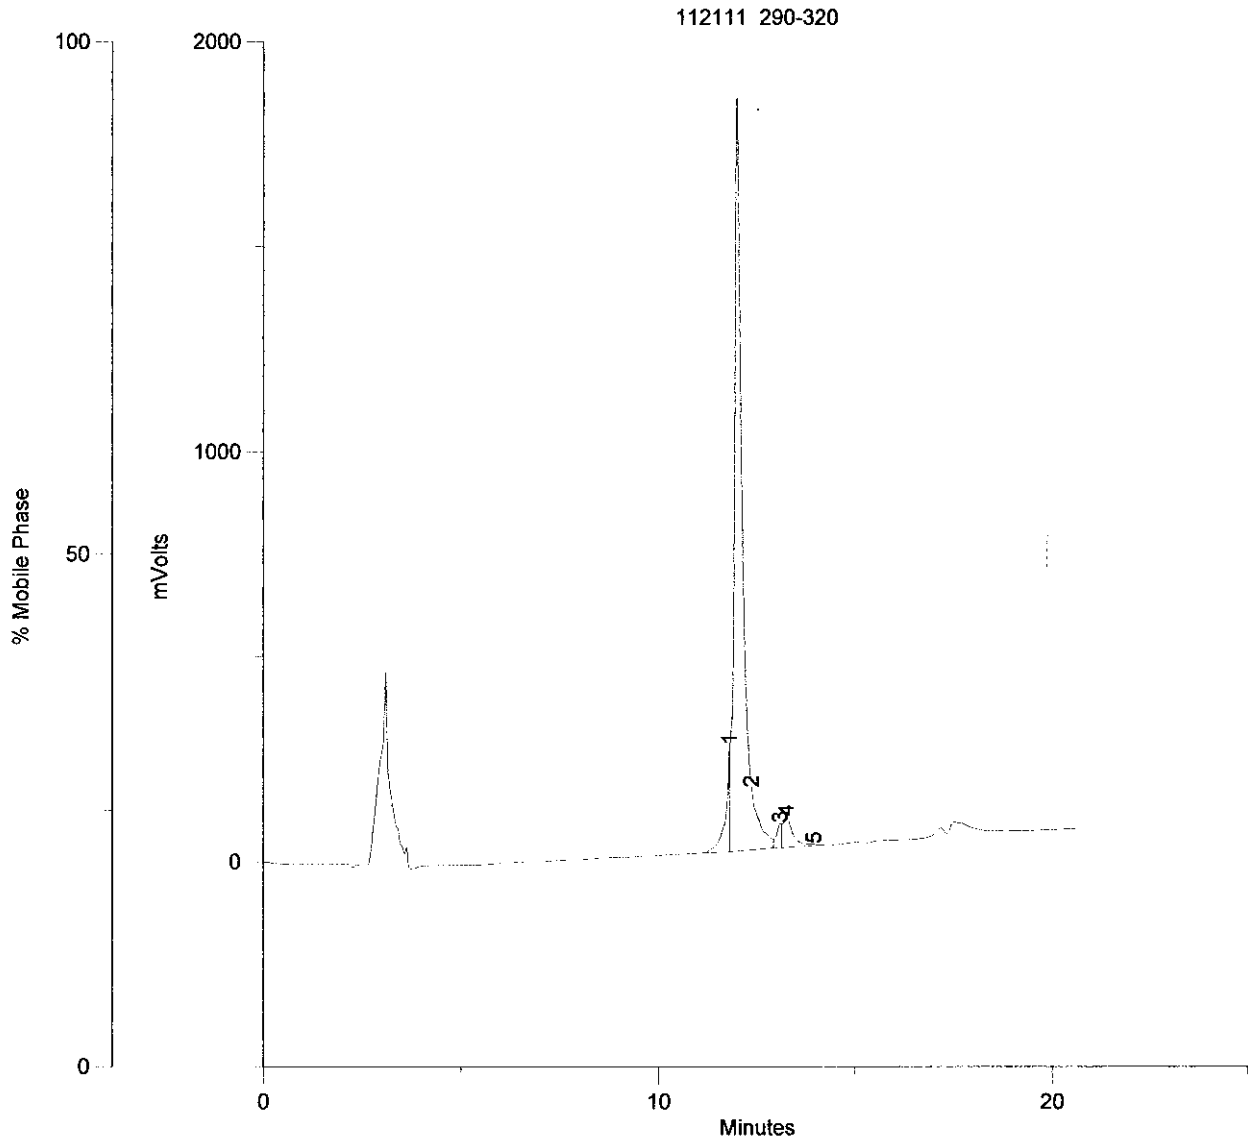

> c:\hplc\system1\051209a.001\051209a.gdt: UV\_1: 112111 290-320: Inj Number: 12  
H2O  
ACN
